# Supplementary material for: Solar powered oxygen systems in remote health centers in Papua New Guinea: a large scale implementation effectiveness trial
Source: PubMed Central journal article supplement (PMC5441450; doi:10.7189/jogh.07.010411), 2017-06
Supplement: jogh-07-010411-s001.pdf [file jogh-07-010411-s001.pdf]

# Online Supplementary Document

Duke et al. Solar powered oxygen systems in remote health centers in Papua New Guinea: a large scale implementation effectiveness trial.

J Glob Health 2017;7:010411

## Solar power and engineering calculations

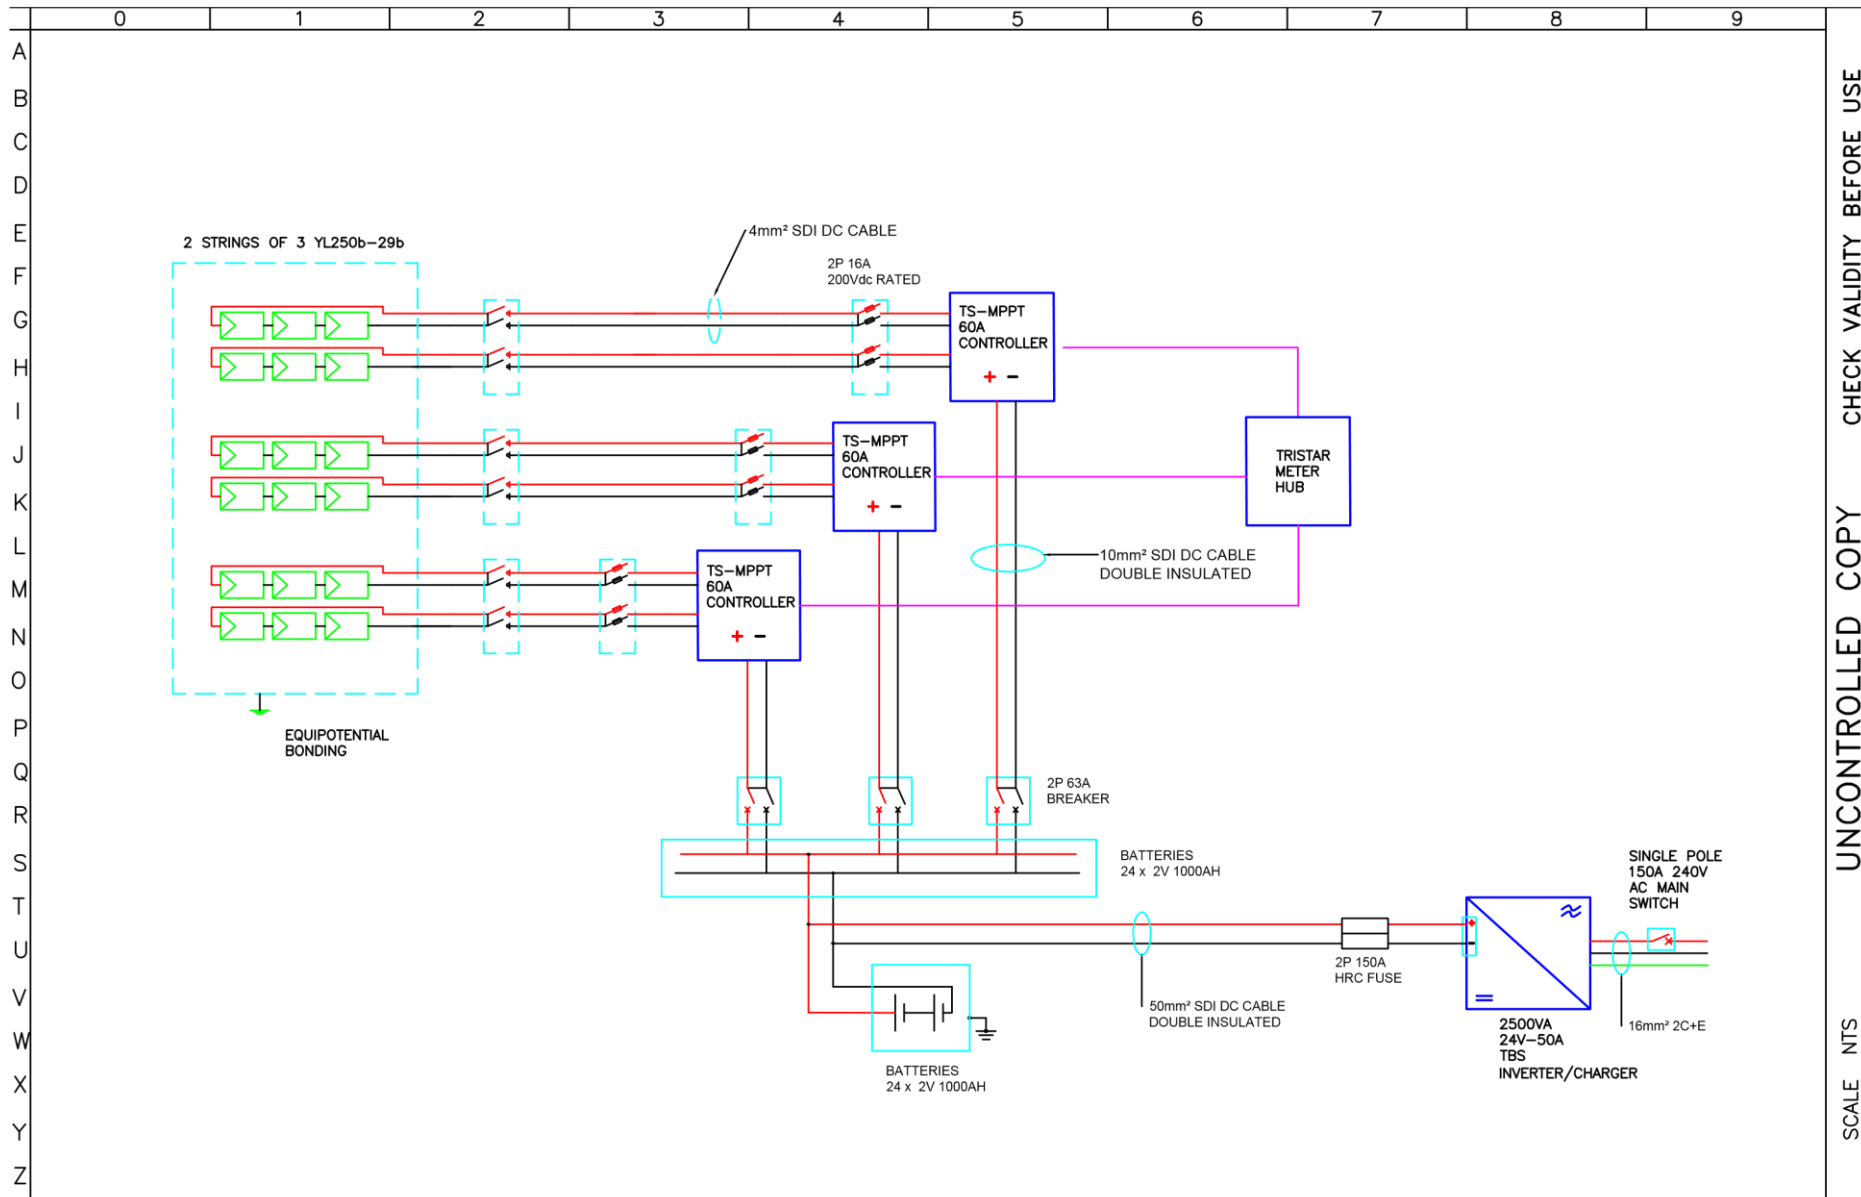

UNCONTROLLED COPY CHECK VALIDITY BEFORE USE

|       |                       |           |       |          |          |
|-------|-----------------------|-----------|-------|----------|----------|
| 04    | REV 0                 |           |       |          |          |
| 03    | NTS                   |           |       |          |          |
| 02    |                       |           |       |          |          |
|       | ORIGINAL              | 10-MAR-15 | SC    | KP       | AP       |
| ISSUE | DETAILS OF AMENDMENTS | DATE      | DRAWN | DESIGNED | APPROVED |

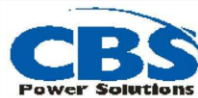

CBS POWER SOLUTIONS FIJI  
 SHOP 1A DANVA RD  
 VALELEVI, NASINU FIJI ISLANDS  
 p: +679 334 2428  
 f: +679 334 1425  
 e: amit@cbspowersolutions.com  
 w: www.cbspowersolutions.com

|                 |                                        |
|-----------------|----------------------------------------|
| TITLE           | PNG SCHEMATIC<br>4.5 kW OFFGRID SYSTEM |
| DOCUMENT NUMBER | ELEC_ OF                               |

|       |     |
|-------|-----|
| ISSUE | AA  |
| SCALE | NTS |
|       | A3  |

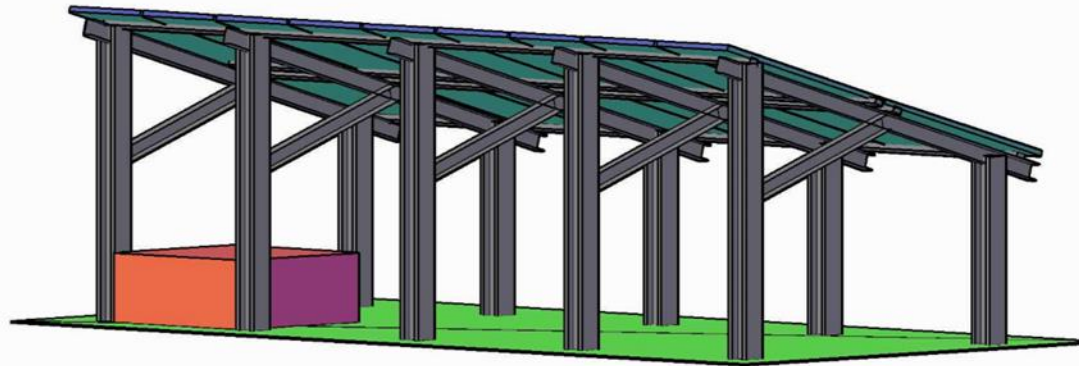

2 STRINGS OF 13 YL250P-29b PANELS

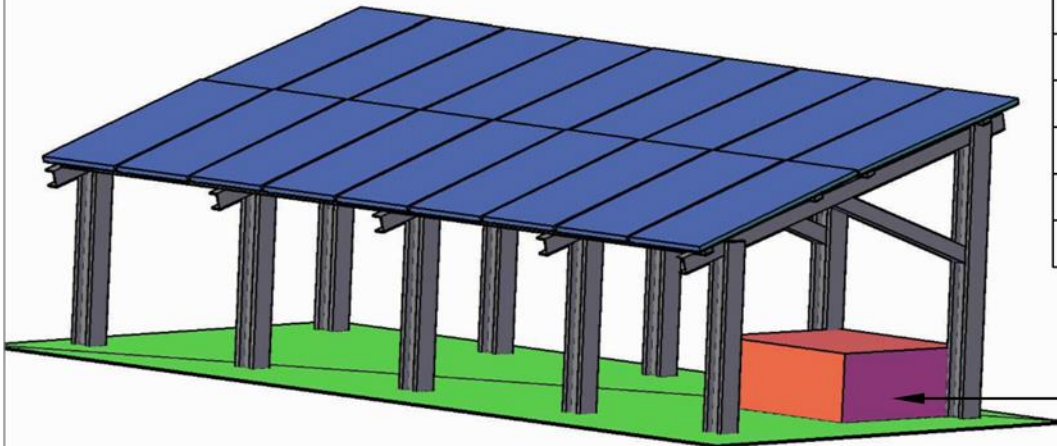

**PAPUA NEW GUINEA - OFFGRID SYSTEM**

| <b>PANEL SPECS.</b>    | <b>BATTERY BOX</b> | <b>BATTERY</b> |
|------------------------|--------------------|----------------|
| P <sub>max</sub> 250W  | LENGTH 1400mm      | 1000AH         |
| I <sub>mp</sub> 8.39A  | DEPTH 850mm        | 48V            |
| V <sub>mpp</sub> 29.8V | WIDTH 950mm        |                |
| DIM-1640mm X 990mm     |                    |                |

BATTERY BOX

|       |                        |          |       |          |
|-------|------------------------|----------|-------|----------|
| 01    | ALL MEASUREMENTS IN MM |          |       |          |
| 02    | NTS                    |          |       |          |
| 03    |                        |          |       |          |
| 04    |                        |          |       |          |
| 05    | ORIGINAL               | 02-03-14 | SC    | KP       |
| ISSUE | DETAILS OF AMENDMENTS  | DATE     | DRAWN | DESIGNED |

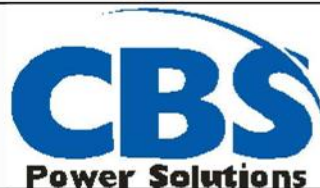

**CBS POWER SOLUTIONS FIJI**  
 SHOP 1A, DANIVA RD  
 VALELEVU, NASINU, FIJI ISLANDS  
 p: +679 334 2428  
 f: +679 334 1425  
 e: amit@cbspowersolutions.com  
 w: www.cbspowersolutions.com

TITLE  
 PNG PROJECT  
 PANEL STRUCTURE  
 4.5 kW OFFGRID SYSTEM

DOCUMENT NUMBER  
 PVSTRCTRE\_01 OF 01

## SYSTEM DESIGN & ENGINEERING CALCULATIONS

### CIRCUIT 1

| Description                                | Value | Unit    |
|--------------------------------------------|-------|---------|
| Load in Watts                              | 1339  | Watts   |
| Days of Autonomy                           | 3     | Days    |
| System Voltage                             | 24    | Vdc     |
| <b>SOLAR MODULE SPECS</b>                  |       |         |
| Maximum Power                              | 250   | Watts   |
| Maximum Voltage                            | 29.8  | Volts   |
| Maximum Current                            | 8.39  | Amps    |
| Open Circuit Voltage                       | 37.6  | Volts   |
| Short Circuit Current                      | 8.92  | Amps    |
| Temperature Coefficient of $P_{max}$       | -0.42 | %/°C    |
| Temperature Coefficient of $V_{oc}$        | -0.32 | %/°C    |
| Temperature Coefficient of $I_{sc}$        | 0.05  | %/°C    |
| Power Tolerance $f_{man}$                  | -0/+5 | W       |
| <b>ENVIRONMENT CONDITIONS &amp; LOSSES</b> |       |         |
| De-rating factor for direct $f_{dirt}$     | 2     | %       |
| Peak Sun Hours                             | 4.53  | Hrs/day |
| Design Maximum Ambient Temperature         | 30    | °C      |
| Design Minimum Ambient temperature         | 17    | °C      |
| Site Maximum Ambient Temperature           | 30    | °C      |

The Temperature derating factor is determined as follows:

$$f_{temp} = 1 - [Y \times (T_{cell,eff} - T_{stc})]$$

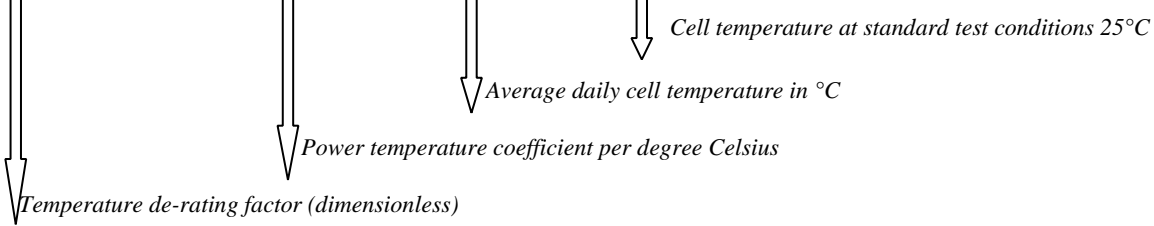

$$T_{cell,eff} = T_a + 25^\circ\text{C} = 28^\circ\text{C} + 25^\circ\text{C} = 53^\circ\text{C} \quad f_{temp} = 1 - [0.42/100 \times (53 - 25)] = \mathbf{0.882}$$

The Temperature derated Output of module is determined as follows:

$$P_{mod} = P_{stc} \times f_{man} \times f_{temp} \times f_{dirt}$$

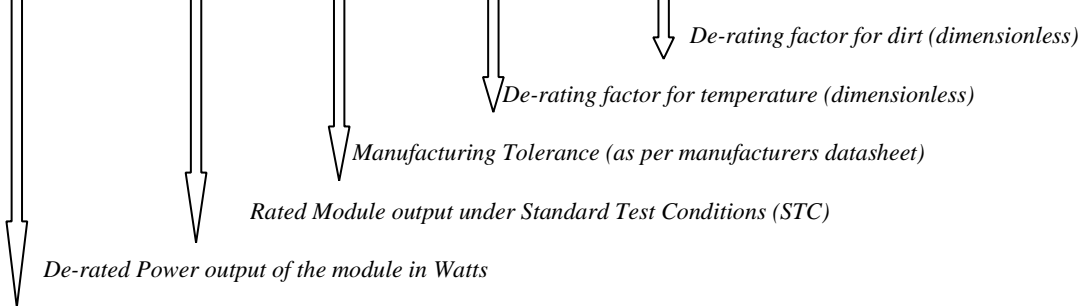

$$P_{mod} = 250 \times 1.02 \times 0.882 \times 0.98 = \mathbf{220.41\text{Watts}}$$

To determine the number of modules in the array to meet the daily design energy demand is calculated as follows:

$$N = (E_{tot} \times f_o) / (P_{mod} \times H_{tilt} \times \eta_{pvss})$$

$N$  → Number of Modules required in the array  
 $E_{tot}$  → Total Daily design Energy Demand  
 $f_o$  → Oversupply co-efficient (dimensionless) – we have designed the system with 25% oversupply  
 $P_{mod}$  → De-rated power output of the module in Watts  
 $H_{tilt}$  → Peak Sun Hours for the specified tilt angle  
 $\eta_{pvss}$  → Efficiency of the PV Sub-system (dimensionless)

$$E_{tot} = (290W \times 2 \times 24Hrs \times 3dys/7dys) + (200W \times 8Hrs) + (9W \times 16 \times 5Hrs) + (15W \times 24Hrs \times 3dys/7dys) + (3000Wh) \quad E_{tot} = 11440$$

Wh/day

$$N = (11440Wh \times 1.25) / (220.41 \times 4.50 \times 0.80) = \mathbf{18.02} \dots \text{round off to } \mathbf{18 \text{ panels}}$$

**Since our design is based on MPPT analysis, we will look at an MPPT controller which can handle 18x250Wp=4500Wp**

**Controller chosen: controller 1 - 1 x 60A Tri-Star MPPT**

**Controller 2 - 1 x 60A Tri-Star MPPT**

**Controller 3 - 1 x 60A Tri-Star MPPT**

**Array Configuration:**

6 panels per controller

2 strings of 3 panels in series per controller (See schematic attached)

The controllers will have synchronized charging to the battery with a meter Hub.

## Battery Calculations

To determine the size of Battery Bank to meet the daily design energy demand is calculated as follows:

$$C_x = (E_{tot} / AV_{dc}) \times (T_{aut} / D.O.D)$$

*Battery Bank Capacity at a certain discharge rate, x*

*Total energy requirement in Watt hours*

*System Average Voltage in 24 Volts*

*Total number of days of autonomy required in days*

Battery Bank at 80% depth of discharge and 3 days back up:

$$C_{10} = (11440 / 24) \times (3 / 0.8) = \mathbf{1787.5 \text{ AH Bank}}$$

### **System Configuration:**

18 x 250W Panels

1800Ah@24V Battery bank

## Cable sizing and Voltage drop calculations

-Length of DC cable  $L_{DC\ cable} = 10m$

-Maximum power point current of panel  $I_{MP} = 8.39A$

-Maximum power point voltage of array  $V_{Array\ max,....}$  Refer to calculation below

$$V_{Array\ max} = No.\ of\ panels \{V_{mp} - [V_{Vmp} (T_{min} - T_{STC})]\}$$

$$= 3 \{29.8 - [0.125(50^\circ C - 25^\circ C)]\}$$

(At lower temperature since voltage would be higher)

$$V_{Array\ max} = 80.025\ V$$

### Determining cross sectional area of the array cable

$$A_{DC\ cable} = \frac{2 \times L_{DC\ cable} \times I_{MP} \times \rho}{\%V_{drop} \times V_{Arraymax}}$$

$$A_{DC\ cable} = \frac{2 \times 10m \times 8.39 \times 0.0183}{0.01 \times 80.025} \dots\dots(1\% \text{ voltage drop assumed})$$

$$A_{DC\ cable} = 3.83mm^2 \dots\dots\dots \mathbf{4mm^2\ SDI\ cable\ would\ be\ suitable}$$

### Determining cross sectional area of Battery charging cable

$$A_{DC\ cable} = \frac{2 \times L_{DC\ cable} \times I_{dcbat} \times \rho}{\%V_{drop} \times V_{Batsys}}$$

$$A_{DC\ cable} = \frac{2 \times 5m \times 60 \times 0.0183}{0.01 \times 24} \dots\dots(1\% \text{ voltage drop assumed})$$

$$A_{DC\ cable} = 45.75 \dots\dots\dots \mathbf{50mm^2\ PVC\ cable\ would\ be\ suitable}$$

### Determining cross sectional area Inverter DC cable

$$A_{DC\ cable} = \frac{2 \times L_{DC\ cable} \times I_{dcinv} \times \rho}{\%V_{drop} \times V_{inverterdc}}$$

$$A_{DC\ cable} = \frac{2 \times 5m \times 105 \times 0.0183}{0.01 \times 24} \dots\dots(1\% \text{ voltage drop assumed})$$

$$A_{DC\ cable} = 80.08mm^2 \dots\dots\dots \mathbf{80mm^2\ PVC\ Battery\ cable\ chosen}$$

## Inverter Selection calculations

### AC Load

(16 x 9W LED lights)+(2x290W Oxy Concentrator)+(200W desktop)+(1x15W Oximeter)+(650kWh/yr) = **1339 W**

The oxygen concentrator will have a surge for very short period of time, so we need to make sure that the inverter chosen can supply that surge for a short period, usually 1 second.

In this case the inverter size chosen is a **2500VA 24V TBS Inverter**. Refer to attached datasheet for specs.

## Protection Equipment Sizing

### DC breakers:

#### PV breaker sizing

#### Rated PV breaker Voltage

$$V_{OC\ arraymax} = No.\ of\ panels \{V_{OC} - [\gamma V_{OC}(T_{min} - T_{STC})]\}$$

$$V_{OC\ arraymax} = 3 \left\{ 37.6 - \left[ \frac{0.32}{100} \times 37.6(50 - 25) \right] \right\} = 104.96V$$

$$V_{OC\ arraymax} = V_{PV\ Breaker}$$

$$V_{PV\ Breaker} = \mathbf{103.78V \dots \text{Approx } 125Vdc \text{ rated PV Breaker}}$$

#### Rated PV Breaker Current

$$I_{PV\ Breaker} = 1.25 \times I_{sc\ array}$$

$$I_{isolator} = 1.25 \times 8.92A$$

$$I_{isolator} = 11.15 \dots \dots \mathbf{\text{Approx } 16A \text{ rated PV breaker required}}$$

### Battery Charging Breaker

Rated voltage to be 24Vdc as per battery bank voltage

Rated current = 1.25% x Rated controller current = 1.25% x 60A = **75A Breaker**

### Inverter DC Side Breaker

For a 2500VA 24V TBS Inverter:



Inverter surge power/system voltage=5500W/24V=229.17A....**250A HRC Fuse**

### **Inverter AC Side Breaker**

Inverter AC surge power/AC system voltage=5500W/240=22.9.....**32A Main Switch**

### **Yearly Average Energy Yield**

Overall system efficiency

$$f_{system} = f_{inv} \times f_{voldropACDC} \times f_{dirt} \times f_{temp} \times f_{man\ tol}$$

$$= 0.93 \times 0.98 \times 0.98 \times 0.91 \times 1$$

$$= \mathbf{0.812.....81.2\%}$$

Expected yearly output of the system

$$E_{avg} = No.\ of\ panels \times P_{mod\ derated} \times peak\ sun\ hours \times 366\ days \times f_{system}$$

$$= 18 \times 220.41W \times 4.53 \times 365 \times 0.812$$

$$= \mathbf{5.33\ MWh/year}$$

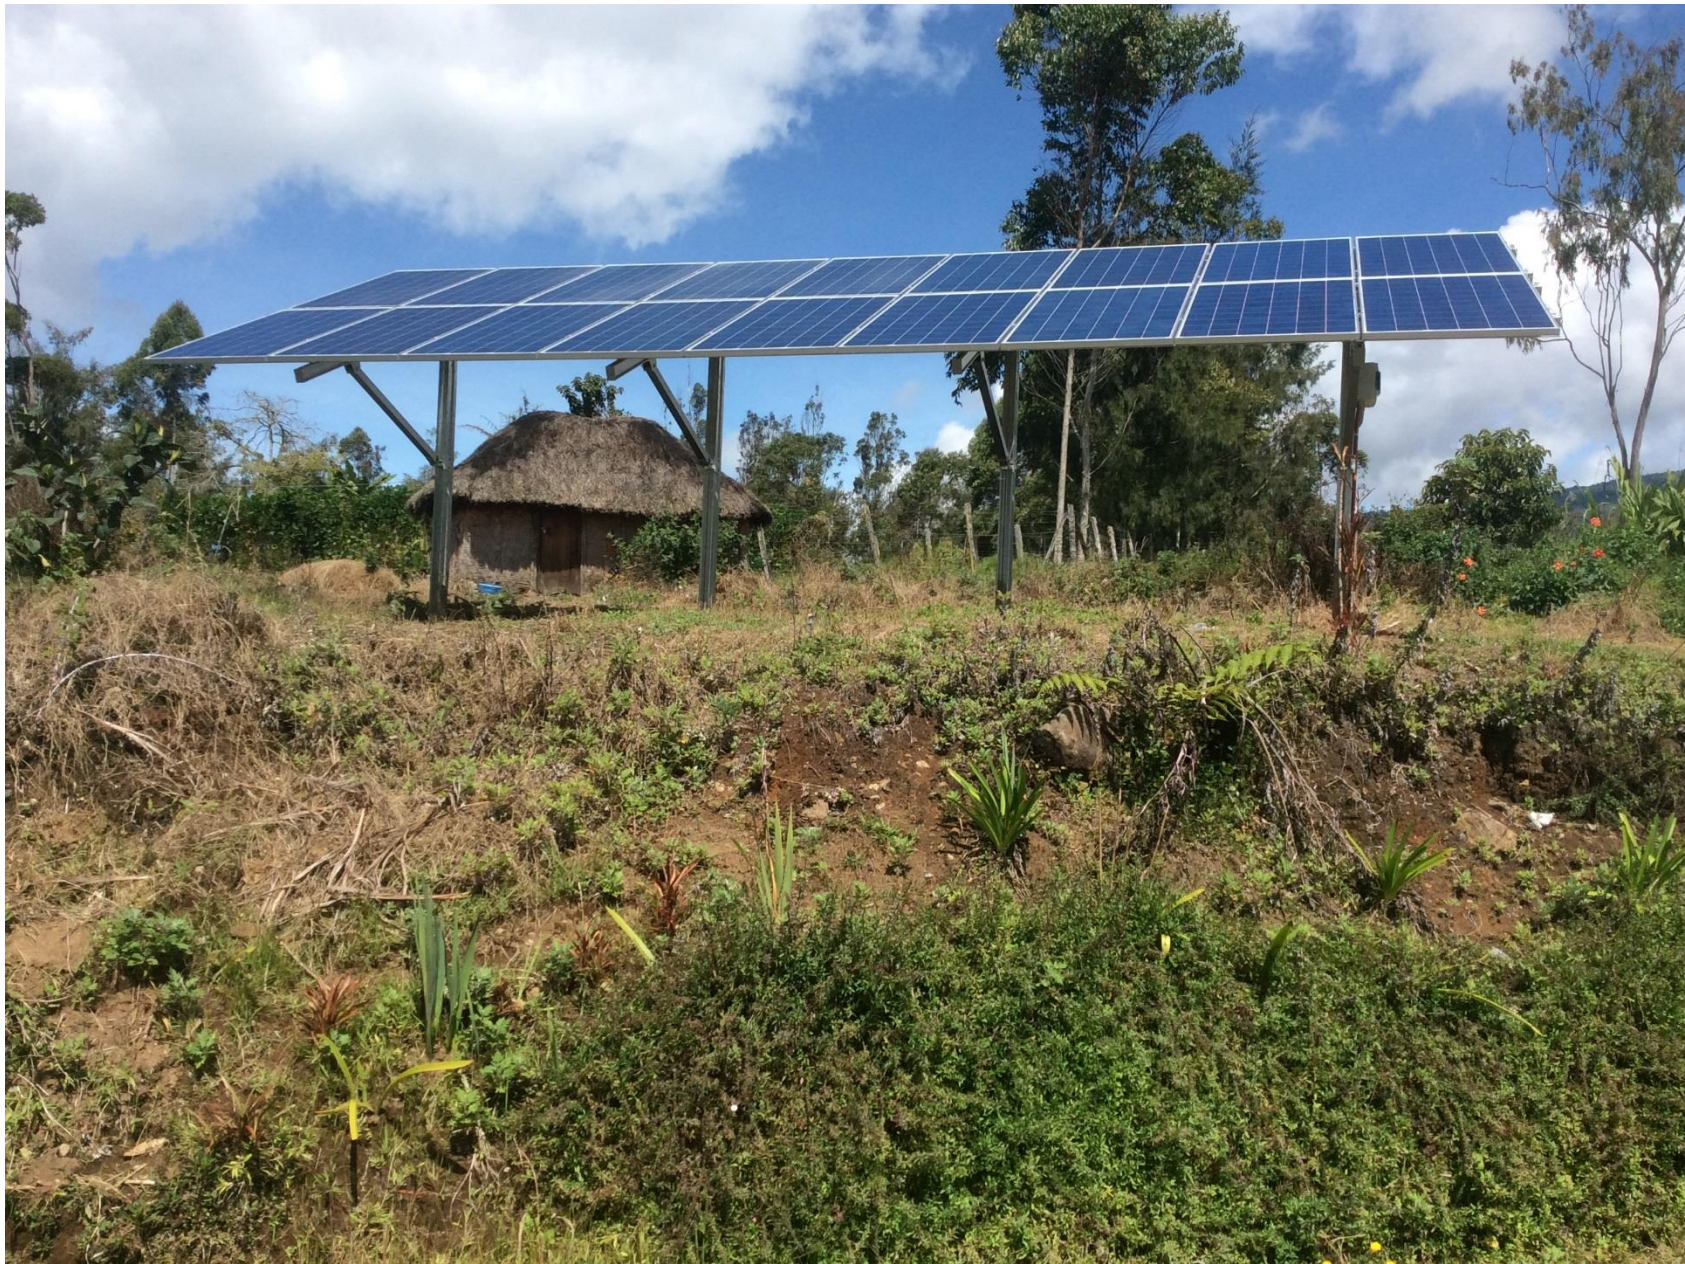

Solar panel configuration at Keripia Health Centre, Western Highlands Province, PNG
